# Supplementary material for: Use of Fermented Hemp, Chickpea and Milling By-Products to Improve the Nutritional Value of Semolina Pasta
Source: PubMed Central journal article supplement (PMC6963495; doi:10.3390/foods8120604), 2019-11-22
Supplement: foods-08-00604-s001.pdf [file foods-08-00604-s001.pdf]

**Supplementary Table S1.** Drying cycle used for making pasta.

| CYCLE | VENTILATION      |       |            | RECOVERY         |       |            |
|-------|------------------|-------|------------|------------------|-------|------------|
|       | Temperature (°C) | U.R.% | Time (min) | Temperature (°C) | U.R.% | Time (min) |
| 1     | 55               | 85    | 3          | 55               | 85    | 2          |
| 2     | 55               | 85    | 3          | 55               | 85    | 2          |
| 3     | 55               | 70    | 3          | 55               | 70    | 4          |
| 4     | 55               | 70    | 3          | 40               | 65    | 8          |
| 5     | 55               | 70    | 3          | 40               | 60    | 10         |
| 6     | 55               | 70    | 3          | 40               | 60    | 10         |
| 7     | 55               | 70    | 3          | 40               | 55    | 10         |
| 8     | 55               | 70    | 3          | 40               | 55    | 12         |
| 9     | 55               | 70    | 3          | 40               | 55    | 12         |
| 10    | 55               | 70    | 3          | 40               | 55    | 12         |
| 11    | 55               | 70    | 3          | 40               | 55    | 12         |
| 12    | 55               | 70    | 3          | 40               | 55    | 14         |
| 13    | 55               | 70    | 3          | 40               | 50    | 14         |
| 14    | 55               | 70    | 3          | 40               | 50    | 16         |
| 15    | 55               | 70    | 3          | 40               | 50    | 16         |
| 16    | 55               | 70    | 3          | 40               | 50    | 16         |
| 17    | 55               | 65    | 3          | 40               | 50    | 16         |
| 18    | 55               | 65    | 3          | 40               | 50    | 18         |
| 19    | 55               | 65    | 3          | 40               | 50    | 18         |
| 20    | 55               | 65    | 3          | 40               | 45    | 18         |
| 21    | 55               | 65    | 3          | 40               | 45    | 18         |
| 22    | 55               | 60    | 3          | 35               | 45    | 18         |
| 23    | 55               | 60    | 3          | 35               | 45    | 18         |
| 24    | 50               | 55    | 3          | 35               | 45    | 18         |
| 25    | 45               | 55    | 3          | 35               | 15    | 18         |
| 26    | 40               | 40    | 3          | 15               | 15    | 10         |
| 27    | 15               | 10    | 20         | 15               | 10    | 20         |
| 28    | 15               | 10    | 20         | 15               | 10    | 20         |

**Supplementary Table S2.** List and definition of the attributes used for the sensory analysis made on pasta samples.

| <b>Attributes</b>     | <b>Abbreviation</b> | <b>Definition</b>                                                                                    | <b>Reference</b> |
|-----------------------|---------------------|------------------------------------------------------------------------------------------------------|------------------|
| <i>Visual</i>         |                     |                                                                                                      |                  |
| Color heterogeneity   | CH                  | Heterogeneity of the pasta color evaluated after cooking                                             | [7]              |
| Texture               | TE                  | Uniformity of the pasta texture at visual inspection                                                 | [49]             |
| Stacking              | ST                  | The degree of piece to piece adhesion                                                                | [50]             |
| <i>Odor</i>           |                     |                                                                                                      |                  |
| Intensity             | OI                  | Odor intensity of pasta                                                                              | [7]              |
| Pungent               | OP                  | Odor pungent of pasta                                                                                |                  |
| <i>Flavour</i>        |                     |                                                                                                      |                  |
| Pungent               | PF                  | Flavour pungent of pasta                                                                             | [51]             |
| Delicate              | DF                  | Flavour delicate of pasta                                                                            |                  |
| Legume                | L                   | Flavor of lentils, beans, chickpeas, etc.                                                            | [51]             |
| Whole                 | W                   | Flavor of whole-wheat flour, buckwheat                                                               |                  |
| Toasted               | TO                  | Grilled and toasty flavor                                                                            | This study       |
| Sapidity              | S                   | Sapidity taste                                                                                       |                  |
| <i>Texture</i>        |                     |                                                                                                      |                  |
| Chewability           | CHE                 | The mouthfeel sensation of labored mastication due to sustained, elastic resistance from the sample. | [49]             |
| General acceptability | GA                  | Overall appreciation                                                                                 | This study       |
